# Supplementary material for: Formation and mechanism of a super-hydrophobic surface with wear and salt spray resistance
Source: Royal Society of Chemistry journal article supplement (doi:10.1039/c7ra06669d), 2017-01-01
Supplement: c7ra06669d1.pdf [file c7ra06669d1.pdf]

Table 1. Surface roughness of SBA-15/BOZ at different stages

|                                    | Ra(um) | Rq(um) |
|------------------------------------|--------|--------|
| Before the salt spray test         | 2.775  | 3.554  |
| After 10 days' salt spray test     | 2.645  | 3.499  |
| After placing into deionized water | 2.796  | 3.543  |
| After heated at 200 °C             | 2.795  | 3.578  |

Table 2. Element values of surface at different stages (A, surface before salt spray test; B, surface after 10 days' salt spray test; C, surface after placing into deionized water; D, surface after heated at 200 °C;)

| Elt. | Conc(A)<br>wt.% | Conc(B)<br>wt.% | Conc (C)<br>wt.% | Conc (D)<br>wt.% |
|------|-----------------|-----------------|------------------|------------------|
| C    | 49.965          | 39.036          | 45.784           | 43.599           |
| N    | .810            | .000            | .000             | 1.663            |
| O    | 28.116          | 17.820          | 28.500           | 31.439           |
| Na   | .140            | 14.368          | .583             | .083             |
| Si   | 18.301          | 12.671          | 22.008           | 21.157           |
| Cl   | .004            | 14.051          | .146             | .065             |
| Fe   | 2.663           | 2.055           | 2.979            | 1.994            |
|      | 100.000         | 100.000         | 100.000          | 100.000          |
